# Supplementary material for: A Longitudinal Study of the Association between the LEPR Polymorphism and Treatment Response in Patients with Bipolar Disorder
Source: MDPI journal article supplement (doi:10.3390/ijms23179635), 2022-08-25
Supplement: s1 [file s1]

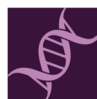

**Supplementary Table S1.** The allele frequencies of the *LEPR* polymorphism in controls and BD patients.

| <i>LEPR</i> |                         | Healthy controls (n= 77) |           |           |       | BD II patients (n= 130) |           |            |       | HapMap-JPT |       |       |
|-------------|-------------------------|--------------------------|-----------|-----------|-------|-------------------------|-----------|------------|-------|------------|-------|-------|
| SNP rs#     | Allele<br>(major/minor) | HO                       | HE        | WT        | HWE   | HO                      | HE        | WT         | HWE   | $p^3$      | MAF   | $p^4$ |
|             |                         | N (%)                    | N (%)     | N (%)     | $p^1$ | N (%)                   | N (%)     | N (%)      | $p^2$ |            |       |       |
| rs1137100   | G/A                     | 0 (0.0)                  | 26 (33.8) | 51 (66.2) | 0.075 | 2 (1.5)                 | 44 (33.8) | 84 (64.7)  | 0.157 | 0.548      | 0.244 | 0.147 |
| rs1137101   | G/A                     | 1 (1.3)                  | 19 (24.7) | 57 (74.0) | 0.676 | 1 (0.8)                 | 26 (20.0) | 103 (79.2) | 0.643 | 0.672      | 0.165 | 0.360 |
| rs12145690  | C/A                     | 1 (1.3)                  | 24 (31.2) | 52 (67.5) | 0.332 | 2 (1.5)                 | 24 (18.5) | 104 (80.0) | 0.662 | 0.119      | 0.188 | 0.575 |
| rs8179183   | G/C                     | 0 (0.0)                  | 9 (11.7)  | 68 (88.3) | 0.586 | 0 (0.0)                 | 8 (6.2)   | 122 (93.8) | 0.717 | 0.128      | 0.128 | 0.108 |

Allele order: major/minor. <sup>1</sup> HWE of healthy controls. <sup>2</sup> HWE of BD patients. <sup>3</sup> Comparison of the genotypic distribution of BD patients with healthy controls using the  $\chi^2$  goodness-of-fit test. <sup>4</sup> Comparison of the allele frequency in healthy controls with HapMap-JPT using the  $\chi^2$  goodness-of-fit test. Abbreviations: HO, homozygous; HE, heterozygous; WT, wild-type; HWE, Hardy–Weinberg equilibrium; MAF, minor allele frequency; JPT, Japanese in Tokyo.
